# Supplementary material for: New Insights into the Host–Pathogen Interaction of Mycoplasma gallisepticum and Avian Metapneumovirus in Tracheal Organ Cultures of Chicken
Source: MDPI journal article supplement (doi:10.3390/microorganisms9112407), 2021-11-22
Supplement: s1 [file s1]

**Table S1:** Primer and probe sequences for pathogen and cytokine quantification

| Target                           | Primer and probe <sup>a</sup>                               | Sequence <sup>b</sup> (5' - 3')                                                                          | Accession no.           | Reference                       |
|----------------------------------|-------------------------------------------------------------|----------------------------------------------------------------------------------------------------------|-------------------------|---------------------------------|
| <b>AMPV SH gene</b>              | SH F<br>SH R<br>MB-SH P                                     | TAGTTTTGATCTTCCTTGTTGC<br>GTAGTTGTGCTCAGCTCTGATA<br>(FAM)-CGCGATCATTGTGACAG<br>CCAGCTTCACGATCGCG-(BHQ-1) | AB548428.1              | Cecchinato <i>et al.</i> , 2013 |
| <b>MG gene</b>                   | Lp F<br>Lp R<br>Lp P                                        | ACTAGAGGGTTGGACAGTTATG<br>RYAACATATCAGAAGCAGTCATT<br>(FAM)-CCCAACAACCTTATCATCA<br>GATTCTGGTGGT-(BHQ-1)   | AY556071 <sup>d</sup>   | Ferguson <i>et al.</i> , 2005   |
| <b>RPL13</b>                     | RPL13 F<br>RPL13 R<br>RPL13 P                               | GGAGGAGAAGAAGCTCAAGGC<br>CCAAAGAGACGAGCGTTTG<br>(FAM)-CTTTGCCAGCCTGCGCAT<br>C-(BHQ-1)                    | NM_204999.1             | Sewada <i>et al.</i> - 1996     |
| <b>chIFN<math>\alpha</math></b>  | chIFN $\alpha$ F<br>chIFN $\alpha$ R<br>chIFN $\alpha$ P    | GACAGCCAACGCCAAAGC<br>GTCGCTGCTGTCCAAGCATT<br>(FAM)-ACTGATCTTTGCTGCCAA<br>ACAGGC-(BHQ-1)                 | U07868.1 <sup>c</sup>   | Petersen <i>et al.</i> , 2013   |
| <b>chINOS</b>                    | chINOS F<br>chINOS R<br>chINOS P                            | CAACAGGAACCTACCATCTGAC<br>GACCACTGGATTCTCCCAATAC<br>(FAM)-ACTGATCTTTGCTGCCAAA<br>CAGGC-(HBQ-1)           | NM_204961               | Hartmann <i>et al.</i> , 2015   |
| <b>chIFN<math>\lambda</math></b> | chIFN $\lambda$ F<br>chIFN $\lambda$ R<br>chIFN $\lambda$ P | CATCAGCCCTCTGGGAAAC<br>CTTGGAAGATGTGGAGGATGG<br>(FAM)-ACAGCCAAGAAGAAGGAG<br>ACCGC-(BHQ-1)                | KJ206897.1 <sup>c</sup> | Sid <i>et al.</i> , 2017        |

<sup>a</sup> F, forward primer; R, reverse primer; P, probe

<sup>b</sup> FAM, 6-carboxyfluorescein; BHQ-1, Black Hole Quencher® (without native fluorescence)

<sup>c</sup> Genomic DNA sequence from GenBank

<sup>d</sup> Target gene used for primer design
